# Supplementary material for: Contribution of proactive management of healthcare risks to the reduction of adverse events in a maternity hospital
Source: PubMed Central journal article supplement — BMJ Open Qual. 2024 Feb 29;13(1):e002456. doi: 10.1136/bmjoq-2023-002456 (PMC10910639; doi:10.1136/bmjoq-2023-002456), 2024-02-29
Supplement: bmjoq-2023-002456supp002.pdf [file bmjoq-2023-002456supp002.pdf]

## Annex 2 - Actions implemented to reduce care-related risks associated with childbirth.

| Action                                   | Action Description                                                                                                                                             |
|------------------------------------------|----------------------------------------------------------------------------------------------------------------------------------------------------------------|
| <i>Review of Care Practices</i>          |                                                                                                                                                                |
| 1                                        | Implementation of initial screening flow by nursing - full-time nurse                                                                                          |
| 2                                        | Risk classification based on the Manchester Triage System                                                                                                      |
| 3                                        | Implementation of MEOWS as an early deterioration tool in screening and care transfer                                                                          |
| 4                                        | Development of a labor induction protocol with systematization of fetal vitality assessment                                                                    |
| 5                                        | Setting a deadline for the arrival of the attending physician in suspected cardiotocographies - 60 minutes, maintaining continuous cardiotocography until then |
| 6                                        | Daily multidisciplinary visits with alignment of approach                                                                                                      |
| 7                                        | Implementation of double-checking of cardiotocography, with unified classification to be categorized by the medical team                                       |
| 8                                        | Revision of the Safety Huddle instrument with a focus on risk identification                                                                                   |
| 9                                        | Implementation of Safety Huddle Phase 2 in the birthing center (local leaders) to optimize conflict escalation in real                                         |
| <i>Training and Capacity Building</i>    |                                                                                                                                                                |
| 10                                       | Training of the nursing team on filling out the partogram in the institutional electronic medical record (Cener®)                                              |
| 11                                       | Monthly team meetings for case discussions and lessons learned                                                                                                 |
| 12                                       | Creation of Safety Alerts to share lessons learned from adverse events and disseminate the flow of safe care to pregnant patients                              |
| 13                                       | Mandatory biennial e-learning on cardiotocography for the medical and nursing staff                                                                            |
| <i>Technology and Automation of Care</i> |                                                                                                                                                                |
| 14                                       | Development of a fetal vitality protocol - acquisition of timers to enforce a maximum of 20 minutes in category 3                                              |
| 15                                       | Implementation of fetal Link with alerts for changes in baseline fetal heart rate pattern and documentation storage in the system                              |
| 16                                       | Definition and implementation of care risk parameters to support the hospital's Monitoring Center                                                              |
| 17                                       | Creation of the Newborn's Medical Record prior to actual birth for pre-prescription of vitamin K1                                                              |
| 18                                       | Creation of Safe Birth Software for identifying the risk of APGAR score less than 7 at the 5th minute based on big data                                        |
| <i>Local Infrastructure</i>              |                                                                                                                                                                |
| 19                                       | Designation of a physical area for screening and medical care (comfort area reduction)                                                                         |
| 20                                       | Increase medical operational capacity to provide complete care for all cases                                                                                   |
| 21                                       | Increase nursing operational capacity                                                                                                                          |
| 22                                       | Implementation of a hemorrhage kit for emergency care                                                                                                          |
| 23                                       | Inclusion of Vitamin K in the anesthesiologist's medication kit                                                                                                |
| 24                                       | Institutional external signage to facilitate locating the birthing center                                                                                      |
