# Supplementary figures and images for: Contribution of proactive management of healthcare risks to the reduction of adverse events in a maternity hospital
Source: PubMed Central journal article supplement — BMJ Open Qual. 2024 Feb 29;13(1):e002456. doi: 10.1136/bmjoq-2023-002456 (PMC10910639; doi:10.1136/bmjoq-2023-002456), 2024-02-29

Annex 1 – Mapping of the childbirth hospital process

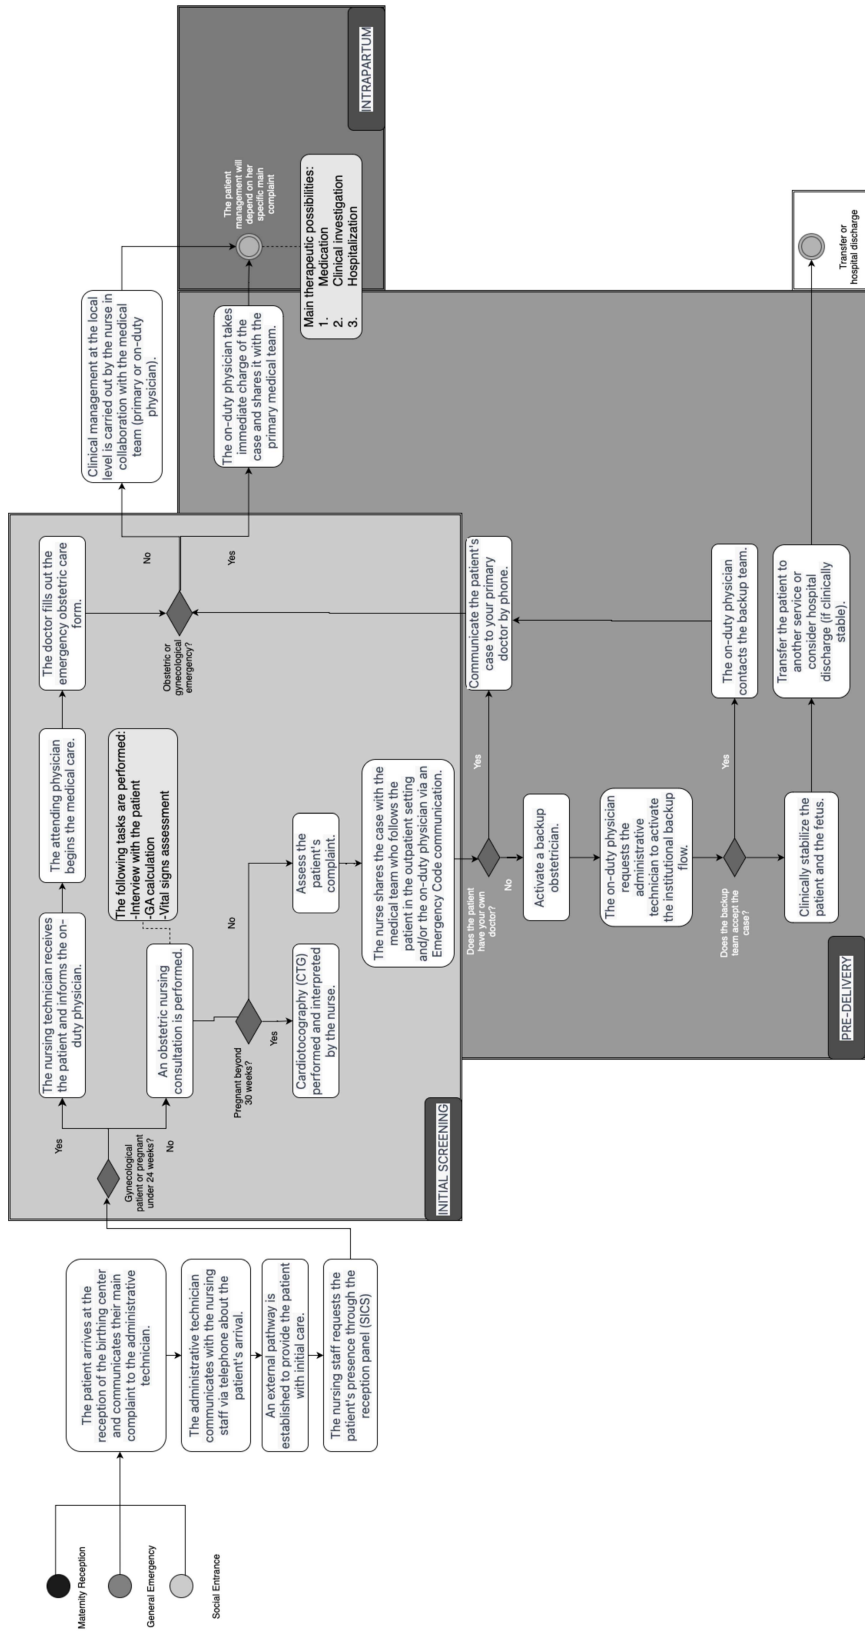

Supplement: bmjoq-2023-002456supp001.pdf [file bmjoq-2023-002456supp001.pdf]
